1 **TITLE:** Incidence and Predictors of Recurrent Pericarditis in Systemic Lupus Erythematosus

2

3 **AUTHORS:** Yoo Jin Kim, MD MS<sup>1\*</sup>, Jana Lovell, MD<sup>2\*</sup>, Alaa Diab, MD MPH<sup>2</sup>, Laurence S.

4 Magder, PhD MPH<sup>3</sup>, Daniel Goldman, PhD MCS<sup>4</sup>, Michelle Petri, MD MPH<sup>4</sup>,

5 Andrea Fava, MD<sup>4</sup>, Luigi Adamo, MD PhD<sup>2</sup>

6

7 **AFFILIATIONS:**

8 1. Department of Medicine, School of Medicine, Johns Hopkins University, Baltimore, MD

9 2. Division of Cardiology, Department of Medicine, Johns Hopkins University, Baltimore, MD

10 3. Department of Epidemiology & Public Health, University of Maryland School of Medicine,  
11 Baltimore, MD

12 4. Division of Rheumatology, Department of Medicine, Johns Hopkins University, Baltimore,  
13 MD

14 \* These authors contributed equally to this work

15  These authors co-directed this work

16

17 **CORRESPONDING AUTHORS:**

18 Dr. Luigi Adamo & Dr. Andrea Fava

19 Division of Cardiovascular Medicine & Rheumatology, Department of Medicine

20 Johns Hopkins University, Baltimore, MD

21 Email: [ladamo2@jhmi.edu](mailto:ladamo2@jhmi.edu) & [afava1@jhmi.edu](mailto:afava1@jhmi.edu)

22

23 **ABSTRACT**

24 **IMPORTANCE:** Pericarditis is the most common cardiac manifestation of Systemic Lupus  
25 Erythematosus (SLE) and known to recur among patients. Yet, the prevalence and risk factors of  
26 recurrent pericarditis in SLE patients are unknown.

27 **OBJECTIVE:** Determine the frequency and risk factors for the recurrence of pericarditis in  
28 patients with SLE.

29 **DESIGN:** Retrospective analysis of a well-characterized, prospective cohort of SLE patients  
30 enrolled between 1988 and 2023.

31 **SETTING:** A single-center cohort study of a diverse group of SLE patients treated at a tertiary  
32 medical center.

33 **PARTICIPANTS:** Patients diagnosed with pericarditis (n=590) among those enrolled in the  
34 Hopkins Lupus Cohort (n=2931).

35 **MAIN OUTCOME:** Re-occurrence of pericarditis. The SELENA revision of the SLE Disease  
36 Activity Index (SLEDAI) was used to define pericarditis. Clinical information was examined for  
37 all follow-up encounters after the first episode of pericarditis. Pericarditis that occurred at least  
38 six weeks after the first recorded episode was defined as “Recurrent”.

39 **RESULTS.** Of 2931 patients within the cohort, 590 had a history of pericarditis. In 3.4% of  
40 patients, the diagnosis of pericarditis was confirmed via electrocardiogram (EKG) or dedicated  
41 imaging, with 100% concordance between clinical and data-based diagnoses. During a median  
42 follow-up of 7 years (IQR: 3 – 14), 20% (n=120) of patients experienced recurrent pericarditis  
43 (recurrence rate  $\approx$  0.05 per person-year of follow-up). Most patients (51%) experienced only one  
44 recurrence, whereas 49% had  $\geq 2$  recurrences. In multivariate analysis, predictors of recurrence

45 included younger age ( $\geq 60$  years vs.  $< 40$ , RR 0.11 (0.04, 0.32),  $P < .001$ ), treatment with  
46 prednisone ( $\geq 20$  mg vs. 0, RR 1.99 (1.17, 3.40),  $P = 0.012$ ), active SLE disease (SLEDAI  $\geq 3$  vs.  
47 0, RR 1.55 (1.21, 2.00),  $P < .001$ ), and time since initial episode (3-10 years vs.  $< 1$ , RR 0.32  
48 (0.20, 0.52),  $P < .001$ ).

49 **CONCLUSION AND RELEVANCE.** Recurrence is more likely to occur within one year of the  
50 onset of pericarditis, and younger patients and those with uncontrolled disease are at greater risk  
51 of recurrence. As in the general population, oral prednisone therapy is associated with a higher  
52 chance of recurrence in SLE patients, with a dose-dependent effect. These findings set the basis  
53 for future studies to define optimal treatment for recurrent pericarditis in SLE patients and  
54 suggest that oral corticosteroids should be avoided when treating pericarditis.

55

## 56 INTRODUCTION

57 Pericarditis, defined as inflammation of the serosal sac that surrounds the myocardium, is  
58 the most common cardiac manifestation of systemic lupus erythematosus (SLE) and noted in  
59 about 20% of patients.<sup>1-3</sup> Patients can experience a spectrum of symptoms, ranging from mild  
60 chest pain exacerbated by lying flat that is improved by leaning forward, to debilitating  
61 symptoms of severe chest pain and dyspnea. Importantly, pericarditis is associated with  
62 complications that include recurrence, myocarditis, and pericardial effusion.

63 In the general population, pericarditis recurs in approximately 30% of cases.<sup>4</sup> Despite the  
64 significant rate of recurrence, the mechanisms predisposing a subset of individuals to recurrence  
65 remains unclear. Caforio and colleagues demonstrated the presence of serum anti-heart and anti-  
66 intercalated-disk autoantibodies in patients with recurrent pericarditis.<sup>5</sup> Furthermore, multiple  
67 clinical trials have demonstrated the efficacy of immunosuppressive agents, such as  
68 corticosteroids, in treating recurrent pericarditis, suggesting an immune-mediated mechanism.<sup>5-8</sup>  
69 Recent pivotal studies further support this hypothesis, particularly implicating interleukin-1, a  
70 pro-inflammatory cytokine of the innate immune system, in the pathophysiology of recurrent  
71 pericarditis. Inhibitors targeting this pathway have proven effective in treating idiopathic  
72 recurrent pericarditis across multiple randomized clinical trials.<sup>7-14</sup>

73 Given the broad immune dysregulation associated with SLE, patients may face greater  
74 risk for recurrence due to possible overlapping immune-mediated mechanisms. However, the rate  
75 of recurrence of pericarditis in SLE patients, its risk factors, and its association with various  
76 treatments have not been characterized. To address this knowledge gap, we analyzed the Hopkins  
77 Lupus Cohort, a large and well-characterized longitudinal cohort of SLE patients.

78

79 **METHODS**

80 **Patients.** The Hopkins Lupus Cohort is a longitudinal, prospective cohort of patients whose  
81 diagnosis of SLE is confirmed before study enrollment.<sup>15</sup> Patient history, laboratory testing, and  
82 clinical information relevant to the classification of SLE and Systemic Lupus International  
83 Collaborating Clinics / American College of Rheumatology Damage Index (SLICC/ACR SDI)  
84 are recorded at the time of cohort entry.<sup>16</sup> Cohort patients are followed quarterly at a minimum,  
85 and clinical information and laboratory testing are updated at subsequent clinical visits. The  
86 Hopkins Lupus Cohort is approved yearly by the Institutional Review Board of the Johns  
87 Hopkins University School of Medicine. We identified patients who either had a history of  
88 pericarditis at the time of cohort entry or were diagnosed with pericarditis during cohort  
89 participation utilizing the criterion described below.

90  
91 **Diagnostic criteria for pericarditis.** Pericarditis was diagnosed using the Safety of Estrogens in  
92 Lupus Erythematosus National Assessment – SLE Disease Activity Index (SELENA-SLEDAI).<sup>17</sup>  
93 One of the following criteria was necessary to be present for the diagnosis of pericarditis: (1)  
94 pericardial pain, (2) auscultation of pericardial rub, (3) presence of pericardial effusion on  
95 imaging, and (4) electrocardiogram (EKG) confirmation.<sup>17,18</sup> Clinical information was examined  
96 for all follow-up encounters after the first episode of pericarditis. “Recurrent” pericarditis was  
97 defined as pericarditis that occurred at least six weeks after the first recorded episode. Multiple  
98 recurrent episodes were identified if pericarditis occurred at least six weeks apart.

99  
100 **Statistical analysis.** The analysis was based on cohort observations that occurred after the  
101 patient’s first episode of pericarditis. For those with a history of pericarditis prior to cohort entry,

102 all cohort follow-up encounters were included. Cohort data were reformatted into a data set with  
103 one record for each person-month of follow-up and used to calculate the rate of reoccurrence per  
104 person-month given various patient characteristics or exposures. For ease of interpretation, rates  
105 per person-month were converted to rates per person-year of follow-up. Rate ratios, confidence  
106 intervals, and p-values were calculated using pooled logistic regression (a form of discrete  
107 survival analysis) as implemented using generalized estimating equations (to account for the fact  
108 that some participants experienced more than one recurrence).<sup>19</sup> Analyses were performed using  
109 SAS 9.4 (SAS Institute, Carey, North Carolina, USA).

110

## 111 **RESULTS**

112 **Patient characteristics.** Among the Hopkins Lupus Cohort (n=2931), 590 patients with a  
113 history of pericarditis were included in analysis. Of these 590 patients, 451 (76%) patients  
114 experienced their first episode of pericarditis prior to cohort entry, and the remaining 139  
115 patients experienced their first episode while in the cohort. The majority of patients were women  
116 (n = 535, 91%) and identified as Black (n = 303, 51%) (Table 1). The median duration of cohort  
117 follow-up observed following the initial acute pericarditis episode was 6.7 years (IQR: 2.5 –  
118 13.6).

119

120 **Overall rate of reoccurrence.** We observed a total of 5277 years of follow-up during which  
121 time there were 278 recurrences of pericarditis for a rate of 0.053 per person-year of follow-up  
122 (95% CI 0.047, 0.059). These events occurred in 120 different patients (20%), and 59 (49%) of  
123 those patients experienced more than one episode of recurrence.

124

125 **Diagnostic criteria for pericarditis.** Patients were diagnosed with pericarditis based on the  
126 SLEDAI criteria, which required the presence of at least one of the following: pericardial chest  
127 pain, pericardial friction rub on auscultation, evidence of effusion, or findings on EKG. Most  
128 patients were diagnosed based on symptomatic reports of pericardial chest pain (n = 567, 96%).  
129 EKG or imaging studies were performed on a small subset of patients: EKG was conducted in 1  
130 (0.2%), while transthoracic echocardiogram (TTE) or computed tomography (CT) imaging  
131 findings demonstrated a pericardial effusion in 19 (3%) and 1 (0.2%) patients, respectively.  
132 Importantly, when diagnostic data was collected in conjunction with symptomatic reports of  
133 chest pain, the clinical diagnosis of pericarditis was confirmed 100% of the time.

134  
135 **Risk factors for recurrent pericarditis.** Demographic, clinical, serologic, and treatment  
136 characteristics were studied in univariate analysis to determine their association with recurrence  
137 among patients with pericarditis (Table 2). Sex did not significantly impact recurrence rates.  
138 Black race was associated with an increased risk of recurrent pericarditis (RR 1.72 (0.99, 2.97),  
139  $P = 0.054$ ), and older age was associated with lower rates of recurrent pericarditis (40-49 years  
140 [RR 0.58 (0.37, 0.90),  $P = 0.016$ ] or 50-59 years [RR 0.25 (0.12, 0.53),  $P < .001$ ] vs. 18-39 years).  
141 Recurrence was more likely to occur within the first year from onset, after which the likelihood  
142 of recurrence decreased (1-3 years vs.  $<1$  RR 0.50 (0.32, 0.79),  $P = 0.003$ ).

143 We evaluated the association of SLE disease activity with the risk of recurrence. We  
144 found that patients with active lupus (SLEDAI scale score  $\geq 3$ ) experienced significantly  
145 increased rates of recurrence (RR 2.34 (1.65, 3.30),  $P < .001$ ). Systemic SLE activity beyond the  
146 pericardium was associated with a risk of recurrence. Interestingly, patients with renal  
147 involvement, such as proteinuria and nephrotic syndrome, as well as those with pulmonary

148 hypertension, had decreased recurrence rates ([Table 2](#)). Hypocomplementemia (C3 and C4) was  
149 associated with increased rates of recurrence. However, a statistically significant association was  
150 limited to C4 (Normal vs. low C4, RR 0.54 (0.37, 0.78),  $P = 0.01$ ) rather than reduced C3  
151 (Normal vs. low C3, RR 0.76 (0.52, 1.09),  $P = 0.14$ ). Seropositivity for double-stranded DNA  
152 (dsDNA) antibodies was associated with increased recurrence (RR 2.05 (1.40, 2.99),  $P < .001$ ).

153 Finally, the therapies of SLE patients with recurrent pericarditis were assessed. Treatment  
154 with oral prednisone at any dose was associated with increased rates of recurrence. Furthermore,  
155 a dose-dependent association with recurrence was observed as the greatest rates of recurrence  
156 were observed with the highest daily doses of prednisone ( $\geq 20\text{mg}$ ) (RR 3.92 (2.31, 6.63),  $P$   
157  $< .001$ ). The use of hydroxychloroquine and other immunosuppressants did not affect recurrences,  
158 and rates of pericarditis were lower after the year 2000. ([Table 2](#)).

159 To gain further insights into our findings, we performed a multivariate Cox hazard model  
160 incorporating covariates identified as significant in the univariate analyses ( $P < 0.05$ ) ([Table 2](#)).  
161 The model identified younger age ( $< 40$  years), time from first episode ( $< 1$  year), daily  
162 prednisone use ( $\geq 20\text{mg}$ ), and clinically active disease (SLEDAI  $\geq 3$ ) as independent predictors  
163 of recurrent pericarditis ([Figure 1](#)). Other variables that were found to be associated with  
164 recurrence in the univariate analyses (low C4, anti-dsDNA, proteinuria, and history of  
165 pulmonary hypertension) were not significantly associated with recurrence after adjustment for  
166 other variables in the multivariable model.



167 **DISCUSSION**

168           In this study, we present a prospective analysis of recurrent pericarditis among SLE  
169 patients. The rate of recurrent pericarditis among patients with SLE was 0.05 per year (120/590  
170 patients, 20%). We found that whereas clinically active SLE and younger age are predictors of  
171 recurrence, systemic involvement beyond the pericardium, such as the renal system (e.g.,  
172 nephrotic syndrome and proteinuria) and pulmonary hypertension, may lead to decreased  
173 recurrence. Importantly, prednisone use led to an increased risk of disease recurrence. These  
174 findings expand our understanding of lupus pericarditis, underscore the need to reconsider using  
175 oral prednisone to treat SLE flares involving the pericardium and identify the need for further  
176 investigation of treatments for lupus pericarditis.

177           SLE is a complex disease characterized by broad immune dysregulation that is  
178 considered the result of autoantibody production from irregularly activated and differentiated B  
179 lymphocytes and abnormal interferon activity.<sup>20</sup> Similarly, the pathogenesis of recurrent  
180 pericarditis in the general population has been presumed to be immune-mediated.<sup>8</sup> Given the  
181 increased potential for auto-immunity among patients with SLE, we hypothesized that patients  
182 with SLE might experience an increased rate of recurrence following an acute episode of  
183 pericarditis. Surprisingly, we found that the rate of pericarditis recurrence among patients with  
184 SLE (20%) was lower than that reported in the general population (~33%).<sup>4,18</sup>

185           Prior studies have examined risk factors for acute pericarditis among patients with SLE.  
186 *Ryu et al.* reported predictors that include African-American ethnicity, anti-smooth muscle, anti-  
187 DNA, hemolytic anemia, proteinuria, and Raynaud's phenomenon.<sup>3</sup> However, to the best of our  
188 knowledge, there have been no studies to date that have investigated the risk factors for  
189 recurrence. We found that elevated SLEDAI scores, younger age at disease onset, recurrence

190 occurring within one year, and higher daily doses of prednisone were independently associated  
191 with a two- to three-fold increased recurrence rate. This suggests that pericarditis recurrence  
192 reflects both patient characteristics and treatment choices. Further, these findings suggest that  
193 specific subgroups of patients with pericarditis may benefit from close monitoring and early  
194 initiation of therapies proven to be effective for recurrent pericarditis, especially as recurrence is  
195 more likely to occur within one year of the onset of pericarditis.<sup>21</sup>

196         The medical management of pericarditis for patients with SLE differs from that for the  
197 general population. Although parenteral administration of glucocorticoids may be preferred to  
198 prolonged oral administration to mitigate the risk of complications (e.g., avascular necrosis), oral  
199 glucocorticoids are still considered for the treatment of SLE flares, including pericarditis.<sup>22,23</sup> In  
200 contrast, colchicine and non-steroidal anti-inflammatory drugs (NSAIDs) are preferred first-line  
201 agents for the treatment of acute pericarditis in the general population.<sup>4,24,25</sup> In fact, the  
202 Investigation on Colchicine for Acute Pericarditis (ICAP) trial demonstrated that glucocorticoid  
203 use is an independent risk factor for recurrence.<sup>25</sup> Furthermore, a meta-analysis of 7 studies,  
204 which included 471 patients, confirmed these findings: not only did steroids increase the risk of  
205 recurrent pericarditis, but low-dose steroids also conferred lower odds of recurrence compared to  
206 high-dose steroids (OR 0.29, 95% CI 0.13, 0.66).<sup>26</sup> In the Hopkins Lupus cohort, we observed a  
207 dose-related effect of oral prednisone treatment on the risk of pericarditis recurrence similar to  
208 that in the general population, which was confirmed in the multivariate analysis. This suggests  
209 that oral prednisone should be avoided whenever possible in patients with SLE and a history of  
210 pericarditis. Further studies will be needed to understand the role of colchicine and IL-1-blocking  
211 antibodies in treating recurrent pericarditis in SLE patients.

212           The use of the SLEDAI criteria to diagnose pericarditis is a limitation of this study. The  
213 SLEDAI definition of pericarditis is, in fact, less stringent than that used by cardiology  
214 associations, such as the European Society of Cardiology (ESC).<sup>18,22</sup> According to the SLEDAI  
215 definition, only one of the following criteria is necessary to be present for diagnosis: (1)  
216 pericardial pain, (2) auscultation of pericardial rub, (3) presence of pericardial effusion on  
217 imaging, and (4) EKG confirmation.<sup>17,18</sup> Within our study cohort, patient-reported pericardial  
218 chest pain was used most often to diagnose pericarditis. Importantly, we found that all patients (n  
219 = 20) who were further evaluated via modalities, including TTE, CT chest imaging, or EKG,  
220 demonstrated findings indicative of pericarditis, thereby fulfilling both SLEDAI and ESC criteria  
221 for the diagnosis of pericarditis. This suggests that clinical criteria alone may be a robust tool for  
222 diagnosing pericarditis among patients with SLE.

223           To conclude, our study describes the rate of recurrent pericarditis among patients with  
224 SLE and describes risk factors associated with recurrence. Our data suggests that, despite the  
225 common practice to use prednisone to treat SLE flares, the use of oral corticosteroids should be  
226 avoided for those with a recent history of pericarditis. Future studies within this unique  
227 population will be needed to determine the most effective treatment method for pericarditis, the  
228 most common cardiac complication of systemic lupus erythematosus.

229

230 **ACKNOWLEDGMENTS**

231 Author contributions: Drs. Luigi Adamo and Andrea Fava had full access to all the data in the  
232 study and took responsibility for the integrity of the data and the accuracy of the data analysis.  
233 Study concept and design: Luigi Adamo, Andrea Fava, and Michelle Petri. Acquisition, analysis,  
234 and interpretation of data: Yoo Jin Kim, Jana Lovell, Alaa Diab, Laurence S. Magder, Daniel  
235 Goldman, Michelle Petri, Andrea Fava, and Luigi Adamo. Drafting of the manuscript: Yoo Jin  
236 Kim, Jana Lovell, Luigi Adamo, and Andrea Fava. Critical revision of the manuscript for  
237 important intellectual content: Yoo Jin Kim, Jana Lovell, Laurence S. Magder, Daniel Goldman,  
238 Michelle Petri, Andrea Fava, and Luigi Adamo. Statistical analysis: Laurence S. Magder.

239

240 Funding/support: This study was supported in part by NHLBI grants 5K08HLO145108-03 and  
241 1R01HL160716-01, awarded to Dr. Luigi Adamo, and NHLBI grant T32-HL007227, awarded to  
242 Dr. Jana Lovell. The Hopkins Lupus Cohort is supported by R01DK134625, awarded to Dr.  
243 Andrea Fava.

244

245 Financial disclosures: The authors have no financial disclosures immediately relevant to this  
246 manuscript to disclose. Dr. Adamo discloses the following other relationships: consultant for  
247 Kiniksa Pharmaceutical and co-founder of i-Cordis, LLC, a start-up company focused on  
248 developing immunomodulatory small molecules to treat heart failure. All the other authors have  
249 no financial interests to report.

250

251 **REFERENCES**

- 252 1. Man BL, Mok CC. Serositis related to systemic lupus erythematosus: prevalence and  
253 outcome. *Lupus*. 2005;14(10):822-6. doi:10.1191/0961203305lu2187oa
- 254 2. Cervera R, Khamashta MA, Font J, et al. Morbidity and mortality in systemic lupus  
255 erythematosus during a 10-year period: a comparison of early and late manifestations in a cohort  
256 of 1,000 patients. *Medicine (Baltimore)*. Sep 2003;82(5):299-308.  
257 doi:10.1097/01.md.0000091181.93122.55
- 258 3. Ryu S, Fu W, Petri MA. Associates and predictors of pleurisy or pericarditis in SLE.  
259 *Lupus Sci Med*. 2017;4(1):e000221. doi:10.1136/lupus-2017-000221
- 260 4. Chiabrando JG, Bonaventura A, Vecchie A, et al. Management of Acute and Recurrent  
261 Pericarditis: JACC State-of-the-Art Review. *J Am Coll Cardiol*. Jan 7 2020;75(1):76-92.  
262 doi:10.1016/j.jacc.2019.11.021
- 263 5. Caforio AL, Brucato A, Doria A, et al. Anti-heart and anti-intercalated disk  
264 autoantibodies: evidence for autoimmunity in idiopathic recurrent acute pericarditis. *Heart*. May  
265 2010;96(10):779-84. doi:10.1136/hrt.2009.187138
- 266 6. Marcolongo R, Russo R, Laveder F, Noventa F, Agostini C. Immunosuppressive therapy  
267 prevents recurrent pericarditis. *J Am Coll Cardiol*. Nov 1 1995;26(5):1276-9. doi:10.1016/0735-  
268 1097(95)00302-9
- 269 7. Imazio M, Trincheri R, Shabeti R. Pathogenesis, management, and prevention of  
270 recurrent pericarditis. *J Cardiovasc Med (Hagerstown)*. Jun 2007;8(6):404-10.  
271 doi:10.2459/01.JCM.0000269708.72487.34

- 272 8. Cantarini L, Imazio M, Brizi MG, et al. Role of autoimmunity and autoinflammation in  
273 the pathogenesis of idiopathic recurrent pericarditis. *Clin Rev Allergy Immunol*. Feb  
274 2013;44(1):6-13. doi:10.1007/s12016-010-8219-x
- 275 9. Lo Presti S, Elajami TK, Reyalde R, Anthony C, Imazio M, Klein AL. Emerging  
276 Therapies for Recurrent Pericarditis: Interleukin-1 inhibitors. *J Am Heart Assoc*. Oct 5  
277 2021;10(19):e021685. doi:10.1161/JAHA.121.021685
- 278 10. Klein AL, Imazio M, Cremer P, et al. Phase 3 Trial of Interleukin-1 Trap Riloncept in  
279 Recurrent Pericarditis. *N Engl J Med*. Jan 7 2021;384(1):31-41. doi:10.1056/NEJMoa2027892
- 280 11. Ostendorf B, Iking-Konert C, Kurz K, Jung G, Sander O, Schneider M. Preliminary  
281 results of safety and efficacy of the interleukin 1 receptor antagonist anakinra in patients with  
282 severe lupus arthritis. *Ann Rheum Dis*. Apr 2005;64(4):630-3. doi:10.1136/ard.2004.025858
- 283 12. Cacoub P, Marques C. Acute recurrent pericarditis: from pathophysiology towards new  
284 treatment strategy. *Heart*. Jul 2020;106(14):1046-1051. doi:10.1136/heartjnl-2019-316481
- 285 13. Brucato A, Imazio M, Gattorno M, et al. Effect of Anakinra on Recurrent Pericarditis  
286 Among Patients With Colchicine Resistance and Corticosteroid Dependence: The AIRTRIP  
287 Randomized Clinical Trial. *JAMA*. Nov 8 2016;316(18):1906-1912.  
288 doi:10.1001/jama.2016.15826
- 289 14. Myachikova VY, Maslyanskiy AL, Moiseeva OM, et al. Treatment of Idiopathic  
290 Recurrent Pericarditis With Goflikcept: Phase II/III Study Results. *J Am Coll Cardiol*. Jul 4  
291 2023;82(1):30-40. doi:10.1016/j.jacc.2023.04.046
- 292 15. Fangtham M, Petri M. 2013 update: Hopkins lupus cohort. *Curr Rheumatol Rep*. Sep  
293 2013;15(9):360. doi:10.1007/s11926-013-0360-0

- 294 16. Gladman D, Ginzler E, Goldsmith C, et al. The development and initial validation of the  
295 Systemic Lupus International Collaborating Clinics/American College of Rheumatology damage  
296 index for systemic lupus erythematosus. *Arthritis Rheum.* Mar 1996;39(3):363-9.  
297 doi:10.1002/art.1780390303
- 298 17. Petri M, Kim MY, Kalunian KC, et al. Combined oral contraceptives in women with  
299 systemic lupus erythematosus. *N Engl J Med.* Dec 15 2005;353(24):2550-8.  
300 doi:10.1056/NEJMoa051135
- 301 18. Adler Y, Charron P, Imazio M, et al. 2015 ESC Guidelines for the diagnosis and  
302 management of pericardial diseases: The Task Force for the Diagnosis and Management of  
303 Pericardial Diseases of the European Society of Cardiology (ESC) Endorsed by: The European  
304 Association for Cardio-Thoracic Surgery (EACTS). *Eur Heart J.* Nov 7 2015;36(42):2921-2964.  
305 doi:10.1093/eurheartj/ehv318
- 306 19. D'Agostino RB, Lee ML, Belanger AJ, Cupples LA, Anderson K, Kannel WB. Relation  
307 of pooled logistic regression to time dependent Cox regression analysis: the Framingham Heart  
308 Study. *Stat Med.* Dec 1990;9(12):1501-15. doi:10.1002/sim.4780091214
- 309 20. Fava A, Petri M. Systemic lupus erythematosus: Diagnosis and clinical management. *J*  
310 *Autoimmun.* Jan 2019;96:1-13. doi:10.1016/j.jaut.2018.11.001
- 311 21. Fava A, Cammarata M, Adamo L. Riloncept use in lupus pericarditis. *Clin Exp*  
312 *Rheumatol.* Mar 19 2024;doi:10.55563/clinexprheumatol/pb3hzb
- 313 22. Fanouriakis A, Kostopoulou M, Andersen J, et al. EULAR recommendations for the  
314 management of systemic lupus erythematosus: 2023 update. *Ann Rheum Dis.* Jan 2  
315 2024;83(1):15-29. doi:10.1136/ard-2023-224762

- 316 23. Kallas R, Li J, Petri M. Predictors of Osteonecrosis in Systemic Lupus Erythematosus: A  
317 Prospective Cohort Study. *Arthritis Care Res (Hoboken)*. Jul 2022;74(7):1122-1132.  
318 doi:10.1002/acr.24541
- 319 24. Imazio M, Belli R, Brucato A, et al. Efficacy and safety of colchicine for treatment of  
320 multiple recurrences of pericarditis (CORP-2): a multicentre, double-blind, placebo-controlled,  
321 randomised trial. *Lancet*. Jun 28 2014;383(9936):2232-7. doi:10.1016/S0140-6736(13)62709-9
- 322 25. Imazio M, Brucato A, Cemin R, et al. A randomized trial of colchicine for acute  
323 pericarditis. *N Engl J Med*. Oct 17 2013;369(16):1522-8. doi:10.1056/NEJMoa1208536
- 324 26. Lotrionte M, Biondi-Zoccai G, Imazio M, et al. International collaborative systematic  
325 review of controlled clinical trials on pharmacologic treatments for acute pericarditis and its  
326 recurrences. *Am Heart J*. Oct 2010;160(4):662-70. doi:10.1016/j.ahj.2010.06.015

327

328

329

330

331



332 TABLES AND FIGURES

**Table 1. Demographics and Clinical Characteristics of Patients with Pericarditis in the Hopkins Lupus Cohort**

|                                                                           | <b>All<br/>(N = 590)</b> |
|---------------------------------------------------------------------------|--------------------------|
| Age at first episode of pericarditis (years), no. (%)                     |                          |
| < 30                                                                      | 257 (44)                 |
| 30-44                                                                     | 208 (35)                 |
| 45-59                                                                     | 102 (17)                 |
| ≥ 60                                                                      | 23 (4)                   |
| Female sex, no. (%)                                                       | 535 (91)                 |
| Race, no. (%)                                                             |                          |
| White                                                                     | 253 (43)                 |
| Black                                                                     | 303 (51)                 |
| Other                                                                     | 34 (6)                   |
| Onset of pericarditis, no. (%)                                            |                          |
| < 1990                                                                    | 106 (18)                 |
| 1990 – 1999                                                               | 165 (28)                 |
| 2000 – 2009                                                               | 215 (36)                 |
| ≥ 2010                                                                    | 104 (18)                 |
| Duration of follow-up after onset of pericarditis (person-years), no. (%) |                          |
| < 5                                                                       | 260 (44)                 |
| 5 – 10                                                                    | 115 (19)                 |
| 10 – 15                                                                   | 91 (15)                  |
| 15 – 20                                                                   | 55 (9)                   |
| ≥ 20                                                                      | 69 (12)                  |
| Recurrent episodes of pericarditis, no. (%)                               |                          |
| 1                                                                         | 61 (10)                  |
| 2 – 4                                                                     | 46 (8)                   |
| 5 – 12                                                                    | 13 (2)                   |

**Table 2. Rates of recurrent pericarditis by demographic, clinical, and treatment characteristics**

| Exposure                                  | Events, no. | Rate, per person-years | Rate ratio (95% CI) | P-value         |
|-------------------------------------------|-------------|------------------------|---------------------|-----------------|
| <b>Demographic characteristics</b>        |             |                        |                     |                 |
| Age group, years                          |             |                        |                     |                 |
| 18-39*                                    | 171         | 0.085                  | 1.0 (Ref)           | NA              |
| 40-49                                     | 74          | 0.054                  | 0.58 (0.37,0.90)    | <b>0.016</b>    |
| 50-59                                     | 28          | 0.025                  | 0.25 (0.12,0.53)    | <b>&lt;.001</b> |
| ≥60                                       | 5           | 0.006                  | 0.05 (0.01,0.18)    | <b>&lt;.001</b> |
| Sex                                       |             |                        |                     |                 |
| Female*                                   | 260         | 0.054                  | 1.0 (Ref)           | NA              |
| Male                                      | 18          | 0.038                  | 0.43 (0.11,1.69)    | 0.228           |
| Race                                      |             |                        |                     |                 |
| White*                                    | 67          | 0.045                  | 1.0 (Ref)           | NA              |
| Black                                     | 172         | 0.061                  | 1.72 (0.99,2.97)    | 0.054           |
| Other                                     | 9           | 0.032                  | 0.90 (0.34,2.34)    | 0.827           |
| Year of onset of pericarditis             |             |                        |                     |                 |
| Before 2000*                              | 71          | 0.082                  | 1.0 (Ref)           | NA              |
| 2000 – 2009                               | 98          | 0.055                  | 0.59 (0.39,0.89)    | <b>0.011</b>    |
| After 2010                                | 109         | 0.042                  | 0.36 (0.22,0.61)    | <b>&lt;.001</b> |
| <b>Clinical characteristics</b>           |             |                        |                     |                 |
| Time from initial episode                 |             |                        |                     |                 |
| <1*                                       | 48          | 0.212                  | 1.0 (Ref)           | NA              |
| 1-3                                       | 59          | 0.105                  | 0.50 (0.32,0.79)    | <b>0.003</b>    |
| 3-10                                      | 91          | 0.048                  | 0.21 (0.14,0.32)    | <b>&lt;.001</b> |
| ≥10                                       | 80          | 0.031                  | 0.12 (0.06,0.23)    | <b>&lt;.001</b> |
| <b>Most recent past clinical findings</b> |             |                        |                     |                 |
| Disease activity, SLEDAI                  |             |                        |                     |                 |
| 0*                                        | 52          | 0.032                  | 1.0 (Ref)           | NA              |
| 1-2                                       | 58          | 0.043                  | 1.32 (0.92,1.89)    | 0.130           |
| ≥10                                       | 156         | 0.088                  | 2.34 (1.65,3.30)    | <b>&lt;.001</b> |
| Low C3                                    |             |                        |                     |                 |
| Normal*                                   | 79          | 0.075                  | 1.0 (Ref)           | NA              |
| Low C4                                    | 190         | 0.048                  | 0.54 (0.37,0.78)    | <b>0.001</b>    |
| Normal*                                   | 75          | 0.098                  | 1.0 (Ref)           | NA              |
| Anti-dsDNA seropositive                   |             |                        |                     |                 |
| Seronegative*                             | 127         | 0.041                  | 1.0 (Ref)           | NA              |
| <b>History of various conditions</b>      |             |                        |                     |                 |
| Anti-SM seropositive                      |             |                        |                     |                 |
| Seronegative*                             | 75          | 0.049                  | 1.0 (Ref)           | NA              |
| Proteinuria                               |             |                        |                     |                 |
| No history*                               | 146         | 0.069                  | 1.0 (Ref)           | NA              |
| Nephrotic syndrome                        | 34          | 0.028                  | 0.47 (0.27,0.82)    | <b>0.008</b>    |
| No history*                               | 242         | 0.06                   | 1.0 (Ref)           | NA              |
| Pulmonary fibrosis                        |             |                        |                     |                 |
| No history*                               | 227         | 0.051                  | 1.0 (Ref)           | NA              |
| Pulmonary hypertension                    |             |                        |                     |                 |
| No history*                               | 252         | 0.058                  | 1.0 (Ref)           | NA              |
| Hemolytic anemia                          |             |                        |                     |                 |
| No history*                               | 242         | 0.055                  | 1.0 (Ref)           | NA              |
| Lymphadenopathy                           |             |                        |                     |                 |
| No history*                               | 158         | 0.053                  | 1.0 (Ref)           | NA              |
| Raynaud syndrome                          |             |                        |                     |                 |
| Not present*                              | 146         | 0.074                  | 1.0 (Ref)           | NA              |
| <b>Current Treatment characteristics</b>  |             |                        |                     |                 |
| Prednisone, mg/day                        |             |                        |                     |                 |
| 0*                                        | 98          | 0.045                  | 1.0 (Ref)           | NA              |
| 1-9                                       | 79          | 0.052                  | 1.54 (0.85,2.79)    | 0.154           |
| 10-19                                     | 45          | 0.076                  | 2.23 (1.25,4.00)    | <b>0.007</b>    |
| ≥20                                       | 216         | 0.063                  | 3.92 (2.31,6.63)    | <b>&lt;.001</b> |
| Hydroxychloroquine use                    |             |                        |                     |                 |
| Not present*                              | 112         | 0.058                  | 1.0 (Ref)           | NA              |
| Immunosuppressant use                     |             |                        |                     |                 |
| Not present*                              | 166         | 0.059                  | 0.92 (0.62,1.36)    | 0.678           |

\* Reference rate for determination of rate ratio for the recurrence of pericarditis

334 **Figure 1.** Results of multivariate analyses demonstrating predictors of recurrent pericarditis  
335 among patients with SLE. Reference rates for the determination rate ratios are summarized in  
336 Table 2.

## Predictors of recurrent pericarditis

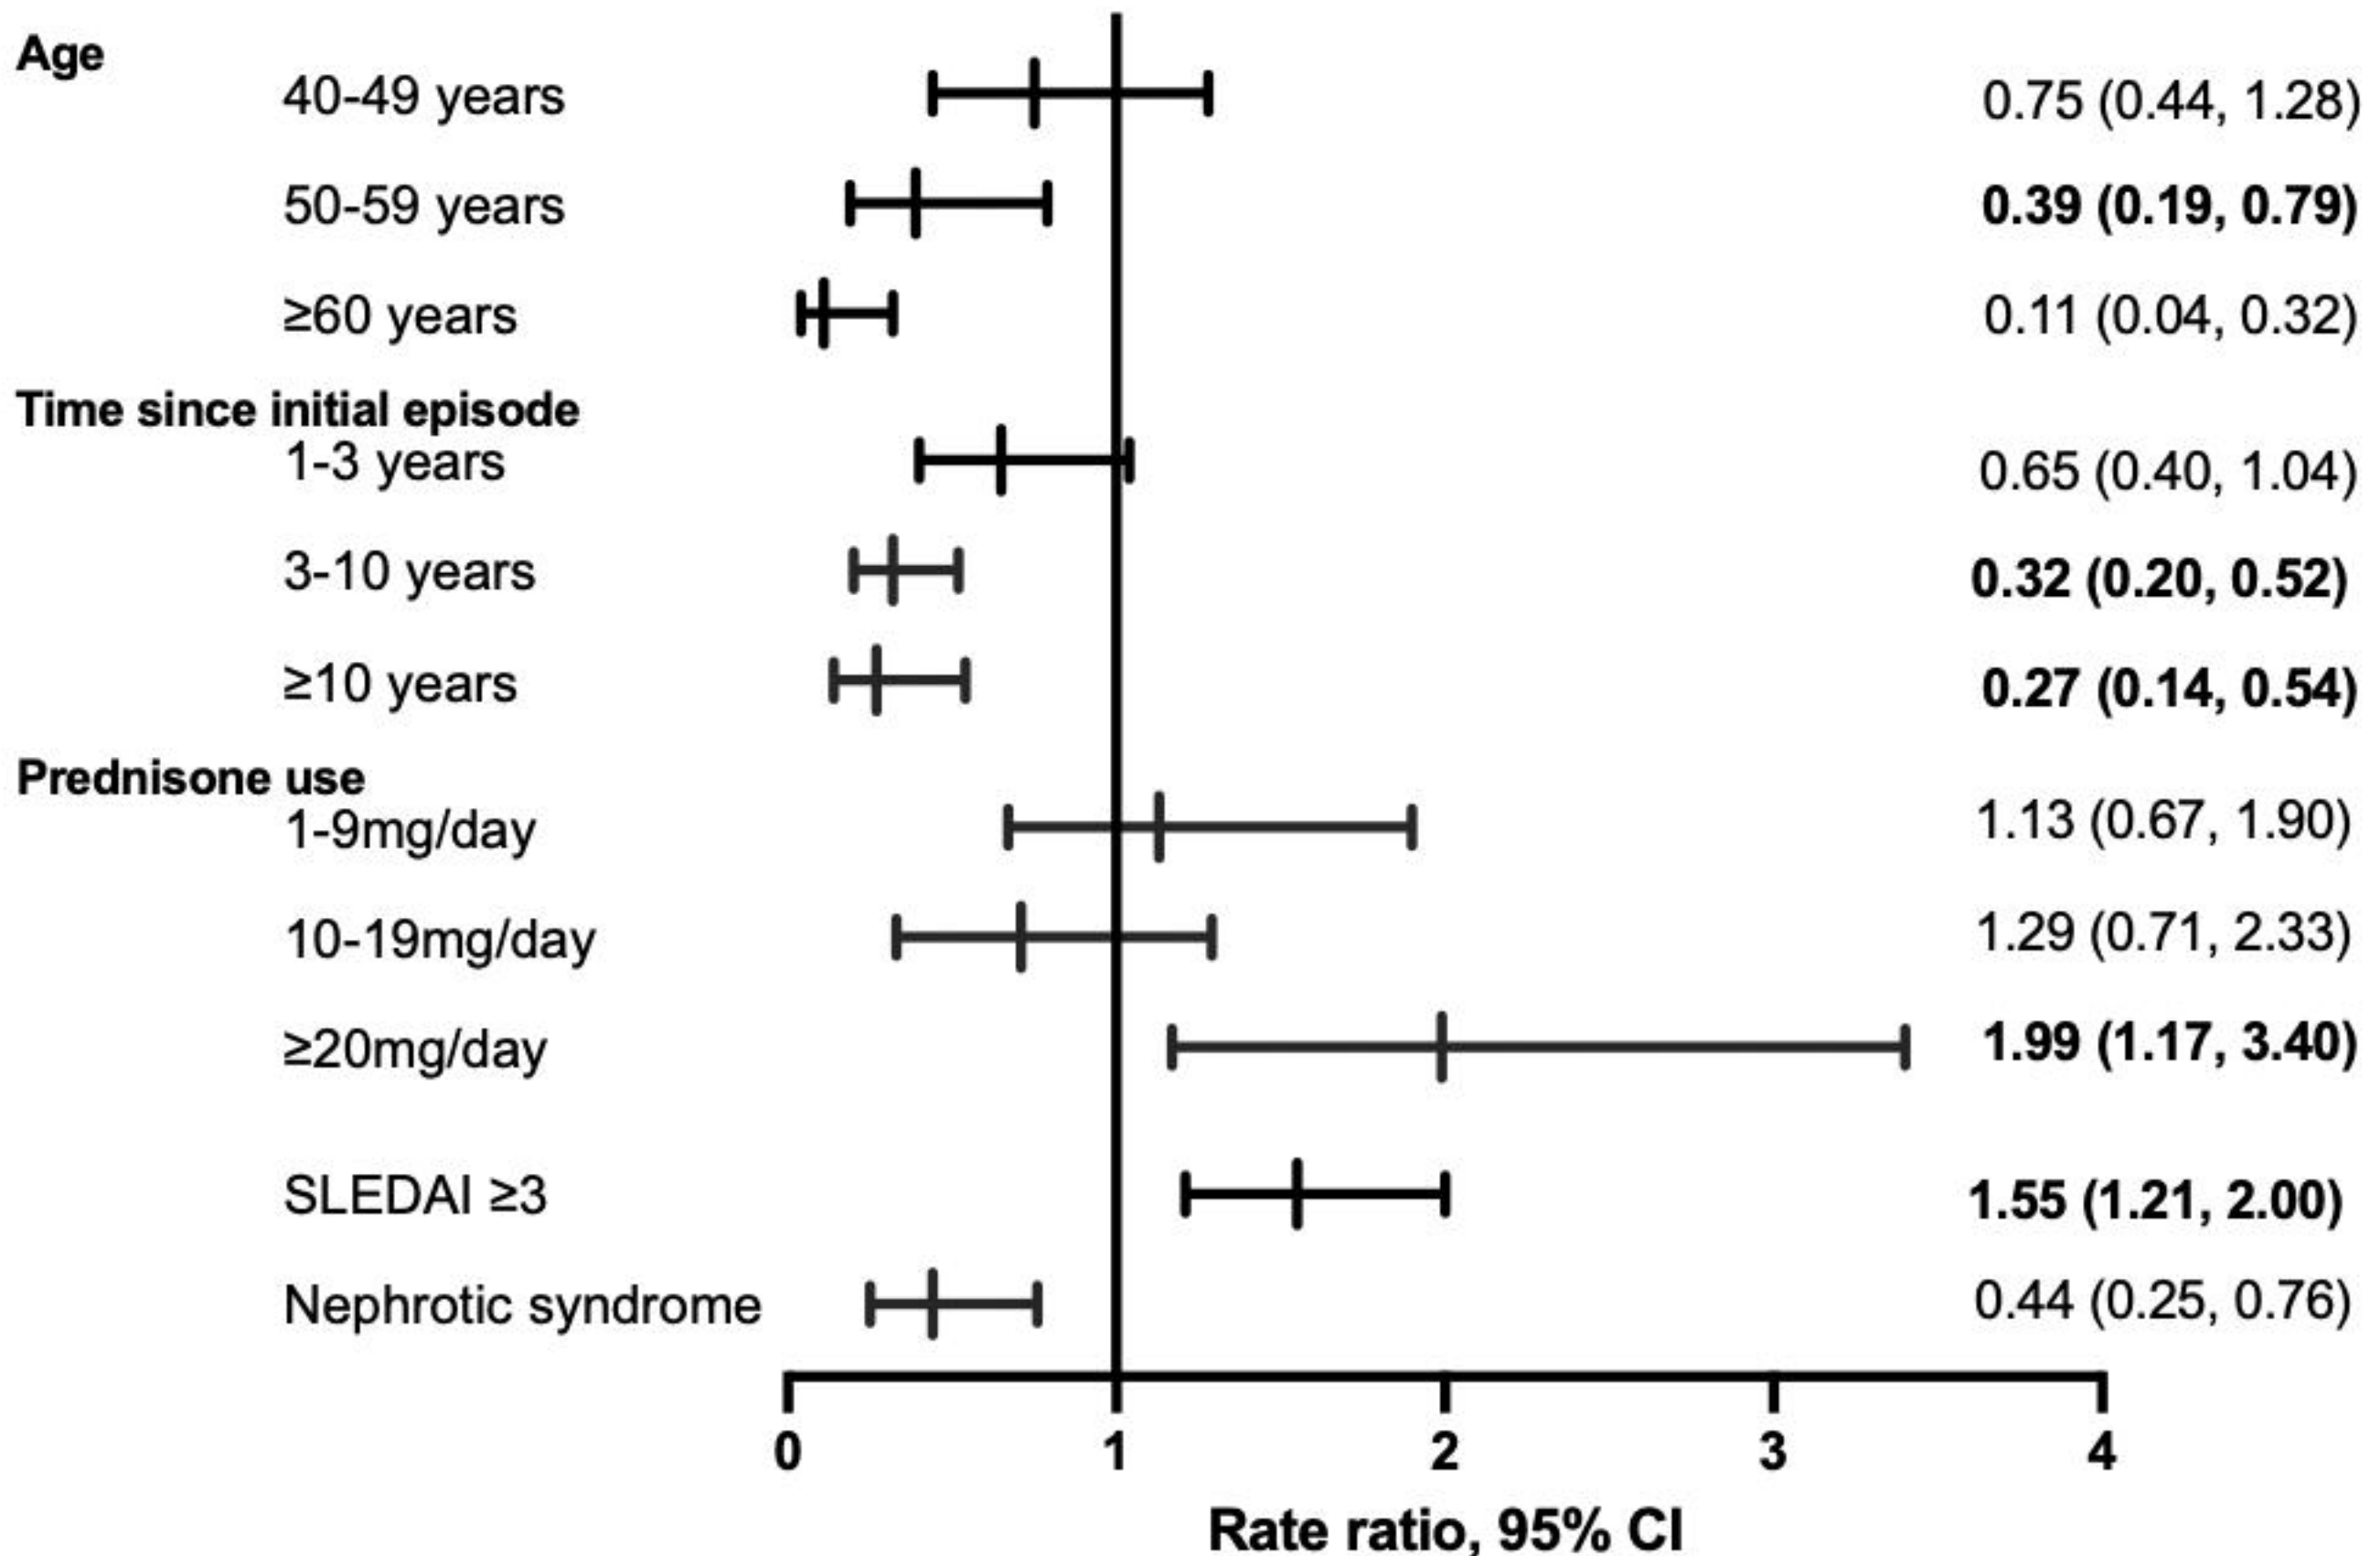

Source: https://medrxiv.org/content/10.1101/2024.06.09.24308628v1.full.pdf
